# Supplementary material for: Supercharged green fluorescent proteins as bimodal reporter genes for CEST MRI and optical imaging
Source: Royal Society of Chemistry journal article supplement (doi:10.1039/c4cc10195b), 2015-01-01
Supplement: c4cc10195b1.pdf [file c4cc10195b1.pdf]

## Supercharged Green Fluorescent Proteins as Bimodal Reporter Genes for CEST and Optical Imaging

A.Bar-Shir<sup>a,b</sup>, Y. Liang<sup>a,b</sup>, K.W.Y. Chan,<sup>a,b</sup> A.A. Gilad<sup>a,b,f</sup>, and J. W. M. Bulte<sup>a-f\*</sup>

<sup>a</sup>*Russell H. Morgan Department of Radiology and Radiological Science, Division of MR Research, the Johns Hopkins University School of Medicine Baltimore, Maryland, USA*

<sup>b</sup>*Cellular Imaging Section and Vascular Biology Program, Institute for Cell Engineering, the Johns Hopkins University School of Medicine Baltimore, Maryland, USA*

<sup>c</sup>*Department of Chemical & Biomolecular Engineering, the Johns Hopkins University School of Medicine Baltimore, Maryland, USA*

<sup>d</sup>*Department of Biomedical Engineering, the Johns Hopkins University School of Medicine Baltimore, Maryland, USA*

<sup>e</sup>*Department of Oncology, the Johns Hopkins University School of Medicine Baltimore, Maryland, USA*

<sup>f</sup>*F.M. Kirby Research Center for Functional Brain Imaging, Kennedy Krieger Institute, Baltimore, Maryland, USA*

### Experimental Procedures

**Protein expression and purification:** *E. coli*-optimized genes encoding to wild type GFP (wt) and its superpositively-charged variants (+36 and +48), achieved by modifying the solvent-exposed amino acids to lysine or arginine, were obtained from Dr. David R. Liu (Harvard University, Cambridge, MA)<sup>1</sup>. The proteins were expressed in BL21 (DE3) *E. coli* after induction in Magic Media,<sup>TM</sup> and purified using cobalt-based immobilized metal affinity chromatography. The expression and purity was determined by SDS-polyacrylamide gel electrophoresis (SDS-PAGE). Pure proteins were dialyzed against 2 M NaCl in PBS.

**CEST MRI:** CEST-MRI experiments were performed on a vertical bore 11.7 T Bruker Avance system, with the sample temperature controlled to be 37°C along the whole experiment. One mm capillaries were loaded with protein solutions in duplicate and located in the middle of a 20 mm rf bird cage coil. A slice thickness of 1 mm, a FOV = 17×16 mm<sup>2</sup>, and a matrix size = 128×64, resulted in a resolution of 0.133×0.25 mm<sup>2</sup> for each CEST/WASSR experiment. CEST-MRI characteristics were measured using a modified RARE sequence (TR/TE=6000/9.4 ms), including a magnetization transfer module (B<sub>1</sub>=4000 ms and variable powers of 2.4 μT, 3.6 μT, 4.7 μT, and 7.2 μT) from -5 to +5 ppm, in increments of 0.2 ppm. To correct for B<sub>0</sub> inhomogeneity, the absolute water resonance frequency shift was determined at each voxel using a modified WASSR method<sup>2</sup>, with the same parameters as in CEST imaging except TR=1.5 sec and B<sub>1</sub> saturation pulse=0.5 μT/250 ms. Mean CEST spectra were derived from an ROI for each sample after B<sub>0</sub> correction using MatLab. MTR asymmetry (MTR<sub>asym</sub>)=100×(S<sup>-Δω</sup> - S<sup>+Δω</sup>)/S<sup>0</sup> was computed at different offsets of Δω.

**Cloning:** The synthetic genes encoded for wt, +36, and +48 GFP were optimized for expression in a mammalian setup and were purchased from Genscript (Piscataway, NJ). All three genes were sub-cloned into the pcDNA3.1 expression vector (Invitrogen, Carlsbad, CA). The optimized genes sequences are as follows:

wt-GFP:

ATGGGACATCATCATCATCATCACGGCGGGGCTTCAAAGGGGAGGAACTGTTTACTGGGGT  
GGTGCCTATTCTGGTGGAGCTGGATGGAGACGTGAATGGCCACAAATTCTCTGTCCGAGGAGA  
GGGAGAAGGAGATGCAACCAACGGAAAGCTGACACTGAAATTTATCTGCACCACAGGCAAGC  
TGCCCGTGCCTTGGCCAACACTGGTCACTACCCTGACTTACGGCGTGCAGTGTTCAGCCGAT  
ATCCAGACCACATGAAGCAGCATGATTTCTTTAAAAGTGCTATGCCCCGAGGGCTACGTGCAGG  
AACGGACTATTTCAATTCAAGGACGATGGGACATATAAACTAGAGCAGAGGTGAAGTTTGAA  
GGGGACACACTGGTCAACAGGATCGAGCTGAAGGGAATTGACTTCAAAGAAGATGGGAATAT  
CCTGGGACACAACTGGAGTACAACTTCAACAGCCATAACGTGTACATCACCGCAGATAAGC  
AGAAAAACGGCATCAAGGCCAATTTCAAAATTAGACACAATGTGGAAGACGGCTCCGTCCAG  
CTGGCCGATCATTACCAGCAGAACACCCCTATCGGAGACGGACCAGTGCTGCTGCCTGATAAT  
CATTATCTGAGCACACAGTCCGCTCTGTCTAAGGACCCCAACGAGAAACGGGATCACATGGTG  
CTGCTGGAATTTGTCACTGCCGCTGGCATTACCCACGGCATGGACGAGCTGTACAAG

+36-GFP:

ATGGGACATCATCATCATCATCACGGCGGAGCAAGCAAAGGCGAGAGGCTGTTTAGAGGGAA  
AGTGCCAATCCTGGTGGAACTGAAAGGAGACGTGAACGGCCACAAGTTCTCTGTCCGAGGCA  
AGGGGAAAGGAGATGCCACACGGGGAAAAGTACTCTGAAGTTTATCTGCACCACAGGCAAG  
CTGCCCGTGCCTTGGCCAACCTGGTCACTACCCTGACATACGGCGTGCAGTGTTCAGCCGA  
TATCCAAAACACATGAAGCGGCATGACTTCTTTAAAAGTGCTATGCCCAAGGGCTACGTGCAG  
GAGCGCACCATTTTCATTCAAGAAGGATGGGAAGTACAAGACCCGGGCCGAGGTGAAGTTTGA  
AGGGAGGACCCTGGTCAACCGCATCAAGCTGAAAGGACGCGACTTCAAGGAAAAAGGGAAT  
ATTCTGGGACACAACTGAGATACAACCTTCAACAGCCATAAGGTGTACATCACAGCAGATAA  
GAGAAAAACGGCATCAAGGCCAAATTCAAGATTAGGCACAATGTGAAGGACGGCTCCGTCC  
AGCTGGCTGATCATTACCAGCAGAACACACCTATTGGCAGAGGGCCCGTGCTGCTGCCTAGGA  
ATCATTATCTGAGCACTCGCTCCAACTGTCTAAGGACCCCAAAGAGAAGCGGGATCACATG  
GTGCTGCTGGAATTTGTACCGCCGCTGGCATCAAACATGGGCGGGACGAGAGATACAAG

+48-GFP:

ATGGGACATCATCATCATCATCACGGGGGAGGTCCAAAGGAAAAAGACTGTTTAGAGGCAA  
GGTCCCTATTCTGGTCAAGCTGAAAGGAGACGTGAACGGCCACAAGTTCTCTGTCCGAGGCAA  
GGGGAAAGGAGATGCCACACGGGGAAAAGTACTCTGAAGTTTATCTGCACCACAGGCAAGC  
TGCCCGTGCCTTGGCCAACCTGGTCACTACCCTGACATACGGCGTGCAGTGTTCAGCCGAT  
ATCCAAAACACATGAAGCGGCATGACTTCTTTAAAAGTGCTATGCCCAAGGGCTACGTGCAG  
GAGCGCACCATTTTCATTCAAGAAGGATGGGAAGTACAAGACCCGGGCCGAAGTGAAGTTTAA  
AGGGAGGACCCTGGTCAACCGCATCAAGCTGAAAGGACGCGACTTCAAGGAGAAAGGGAAT  
ATTCTGGGACACAACTGAGATACAACCTTCAACAGCCATAAGGTGTACATCACAGCAGACAA  
GAGAAAAACGGCATCAAGGCCAAATTCAAGATTAGGCACAATGTGAAAGATGGCTCCGTCC  
AGCTGGCTAAGCATTACCAGCAGAAACACCTATTGGCAGAGGGCCCGTGCTGCTGCCTAGG  
AAGCATTATCTGAGCACTCGCTCCAACTGTCTAAGGACCCCAAAGAGAAGCGGGATCACAT  
GGTGCTGCTGGAATTTGTACCGCCGCTGGCATCAAGCATGGGCGGGATAAAAGATACAAG

*Expression in mammalian cells:* Human Embryonic Kidney 293 cells (HEK-293T) were transfected with one of the following vectors, pcDNA3.1-wtGFP, pcDNA3.1-+36GFP, or pcDNA3.1-+48GFP, with the aid of the Lipofectamine-2000 (Invitrogen, Carlsbad, CA) transfection reagent. Twenty-four hours following transfection, a fluorescent microscope was used to monitor green fluorescence from transfected and non-transfected cells.

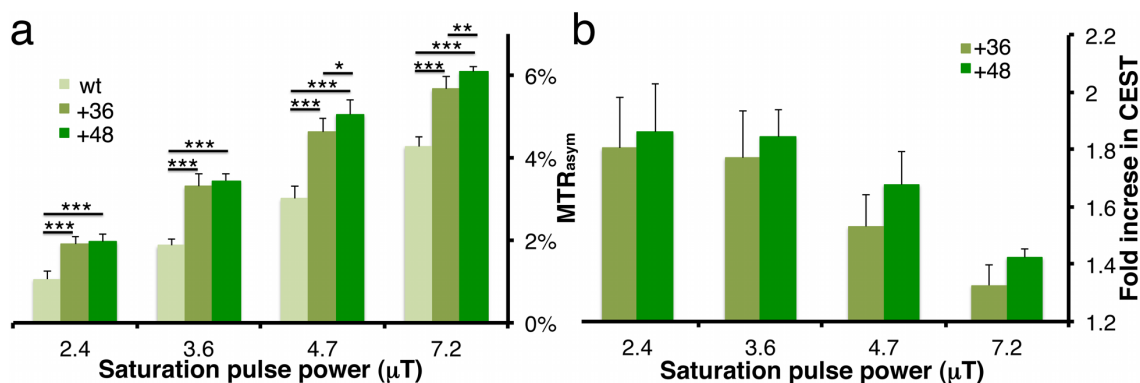

**Figure S1.** CEST characteristics of GFP proteins as obtained when a saturation pulse was applied at 1.8 ppm frequency offset. a)  $MTR_{\text{asym}}$  values at different rf power, and b) increase in the obtained  $MTR_{\text{asym}}$  value relative to wt GFP. CEST data of 1.25 mg/ mL pure protein solutions were acquired at 11.7 T, 37°C, pH=7.2, and  $B_1=4000$  ms. N=7 for each sampled protein. P-values were calculated using a Student's t-test. \*  $p<0.05$ , \*\*  $p<0.01$ , \*\*\*  $p<0.001$ .

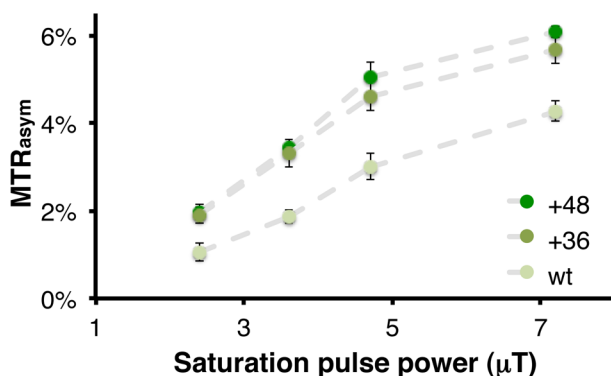

**Figure S2.** The dependency of the obtained  $MTR_{\text{asym}}$  values on the applied saturation pulse ( $B_1$ ) power at  $Dw=1.8$  ppm. Data of 1.25 mg/ mL pure protein solutions were acquired at 11.7 T, 37°C, pH=7.2, and  $B_1=4000$  ms. N=7 for each sampled protein.

**Table S1:** Number of arginine residues and the measured  $MTR_{\text{asym}}$  value obtained at 1.8 ppm (1.25 mg/mL) at different  $B_1$  powers.

|         | No. of arginines | $MTR_{\text{asym}}$<br>$B_1=2.4$ mT | $MTR_{\text{asym}}$<br>$B_1=3.6$ mT | $MTR_{\text{asym}}$<br>$B_1=4.7$ mT | $MTR_{\text{asym}}$<br>$B_1=7.2$ mT |
|---------|------------------|-------------------------------------|-------------------------------------|-------------------------------------|-------------------------------------|
| wt GFP  | 7                | $1.1\pm0.2\%$                       | $1.9\pm0.2\%$                       | $3.0\pm0.3\%$                       | $4.3\pm0.2\%$                       |
| +36 GFP | 20               | $1.9\pm0.2\%$                       | $3.3\pm0.3\%$                       | $4.6\pm0.3\%$                       | $5.7\pm0.3\%$                       |
| +48 GFP | 21               | $2.0\pm0.2\%$                       | $3.4\pm0.2\%$                       | $5.1\pm0.3\%$                       | $6.1\pm0.1\%$                       |

## References

- 1(a) M. S. Lawrence, K. J. Phillips and D. R. Liu, *J Am Chem Soc*, 2007, **129**, 10110; (b) J. J. Cronican, D. B. Thompson, K. T. Beier, B. R. McNaughton, C. L. Cepko and D. R. Liu, *ACS Chem Biol*, 2010, **5**, 747; (c) B. R. McNaughton, J. J. Cronican, D. B. Thompson and D. R. Liu, *Proc Natl Acad Sci USA*, 2009, **106**, 6111.
- 2) M. Kim, J. Gillen, B. A. Landman, J. Zhou and P. C. van Zijl, *Magn Reson Med*, 2009, **61**, 1441.
